# Supplementary material
Source: Springer Nature journal article supplement (https://www.springermedizin.de/resource/supplementary/12871_2014_316_MOESM5_ESM.pdf/9429076)

**A****PCT**

Pre-analytic factor

Change % (95% CI), p value

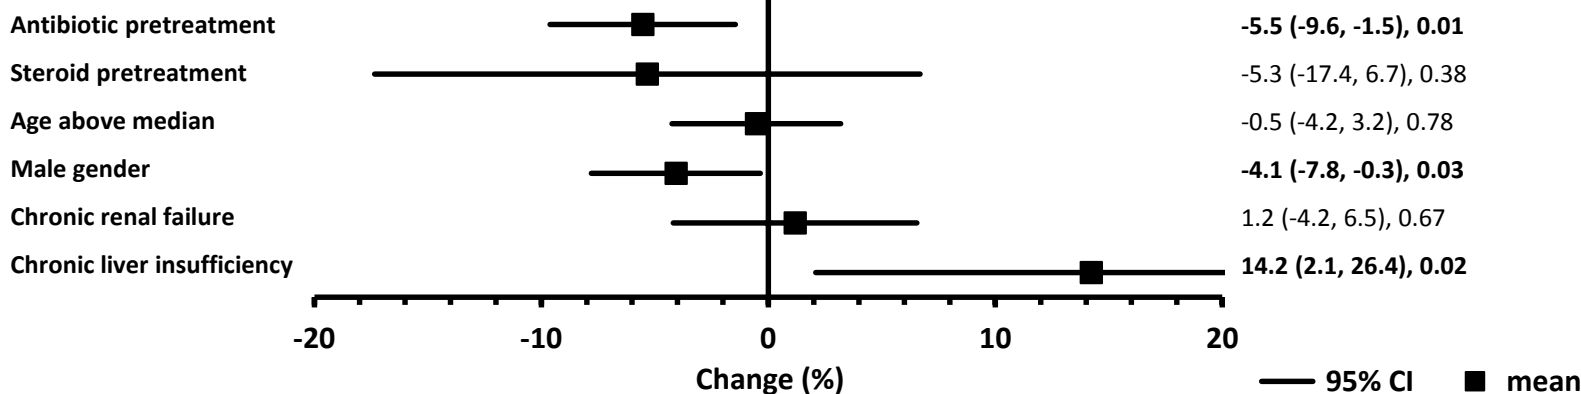**B****CRP**

Pre-analytic factor

Change % (95% CI), p value

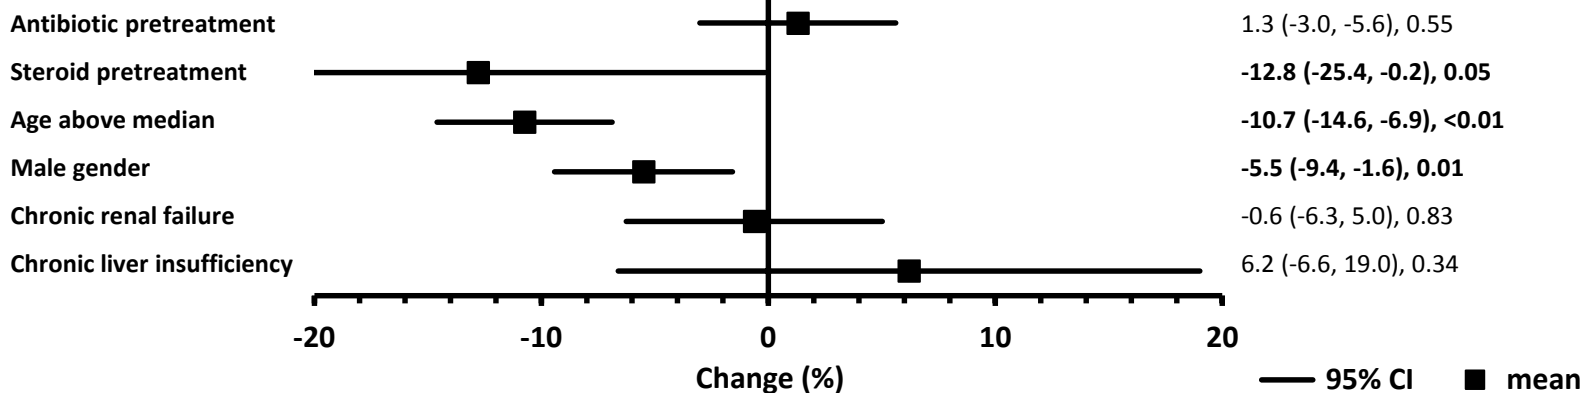**C****WBC**

Pre-analytic factor

Change % (95% CI), p value

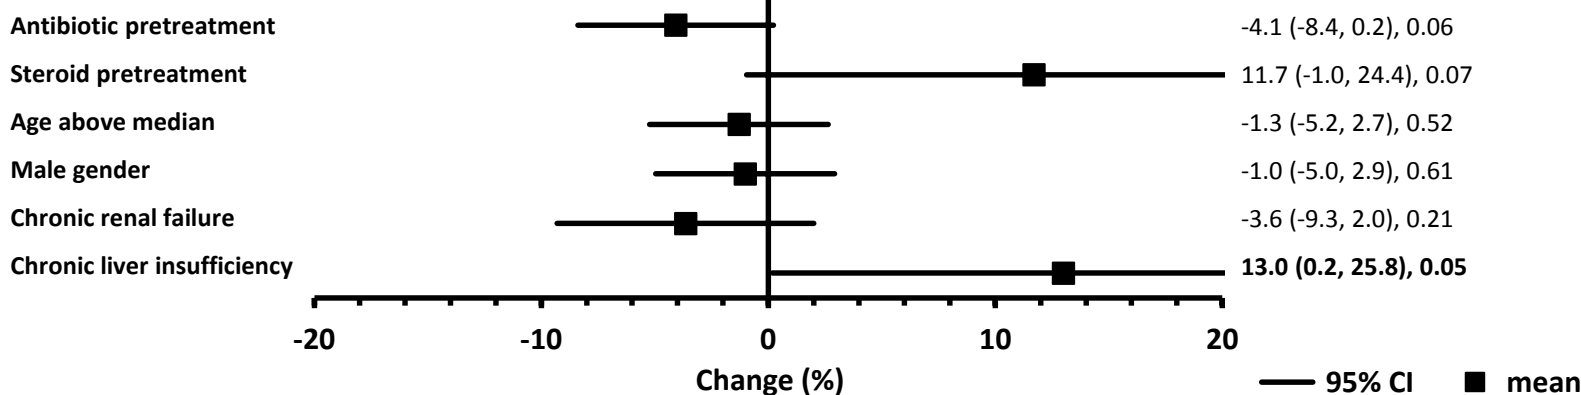

Supplement: MOESM5 [file 9429076]
